# Supplementary material for: UPLC-MS/MS Based Identification of Dietary Steryl Glucosides by Investigation of Corresponding Free Sterols
Source: PubMed Central journal article supplement (PMC6113793; doi:10.3389/fchem.2018.00342), 2018-08-22
Supplement: Data_Sheet_1.pdf [file Data_Sheet_1.pdf]

## ***Supplementary Material***

### **UPLC-MS/MS based identification of dietary steryl glucosides by investigation of corresponding free sterols**

**Linda H. Münger<sup>1</sup>, Samy Boulos<sup>1</sup>, Laura Nyström<sup>1\*</sup>**

<sup>1</sup>Laboratory of Food Biochemistry, Institute of Food, Nutrition and Health, Department of Health Sciences and Technology, ETH Zurich, Zurich, Switzerland

**\* Correspondence:**

Prof. Dr. Laura Nyström  
laura.nystroem@hest.ethz.ch

**Contents:**

|                                                                                 |            |
|---------------------------------------------------------------------------------|------------|
| <b>1) Spectral similarity score.....</b>                                        | <b>1-2</b> |
| <b>2) ESI-MS/MS spectra of FS.....</b>                                          | <b>3-8</b> |
| <b>3) Fragmentation pathways.....</b>                                           | <b>9</b>   |
| <b>4) GC-MS analysis of SG from potato peel after enzymatic hydrolysis.....</b> | <b>10</b>  |

## 1) Spectral similarity score

**Table S1** Selection of relevant mass-to-charge-ratios ( $m/z$ ) used for spectral similarity score calculations.

| $[m/z]$       |
|---------------|
| 81.071        |
| 95.086        |
| 109.102       |
| 121.102       |
| 123.118       |
| 131.087       |
| 133.102       |
| 135.118       |
| 145.102       |
| 147.118       |
| 149.134       |
| 159.118       |
| 161.133       |
| 163.147       |
| 173.133       |
| 175.149       |
| 177.162       |
| 185.133       |
| 187.148       |
| 189.165       |
| 191.181       |
| 199.149       |
| 201.164       |
| 203.18        |
| 205.196       |
| 213.165       |
| 215.18        |
| 217.196       |
| 241.196       |
| 243.212       |
| 253.196       |
| 255.212       |
| 257.228       |
| 259.243       |
| 295.243       |
| 297.259       |
| 309.258       |
| 311.274       |
| 313.289       |
| Precursor ion |

**Table S2** Spectral similarity scores between non-isomeric and isomeric FS ordered by decreasing masses; scores higher than 0.99 indicating equal spectra are highlighted in bold; isomeric sterols are labelled with identical letters; for calculation of similarity score among all FS the precursor ion was not included.

|                                      | Lanosterol | Sitostanol  | Sitosterol  | $\Delta^5$ -Avenasterol <sup>a</sup> | Spinasterol <sup>a</sup> | Stigmasterol <sup>a</sup> | Campesterol | Brassicasterol <sup>b</sup> | 24-Methylenecholesterol <sup>b</sup> | Ergosterol | Coprostanol <sup>c</sup> | Cholestanol <sup>c</sup> | Cholesterol | 7-Dehydrocholesterol <sup>d</sup> | Desmosterol <sup>d</sup> |
|--------------------------------------|------------|-------------|-------------|--------------------------------------|--------------------------|---------------------------|-------------|-----------------------------|--------------------------------------|------------|--------------------------|--------------------------|-------------|-----------------------------------|--------------------------|
| Lanosterol                           | -          | 0.83        | 0.88        | 0.84                                 | 0.84                     | 0.85                      | 0.87        | 0.86                        | 0.90                                 | 0.70       | 0.84                     | 0.86                     | 0.86        | 0.72                              | 0.90                     |
| Sitostanol                           | 0.83       | -           | 0.79        | 0.65                                 | 0.63                     | 0.63                      | 0.79        | 0.64                        | 0.74                                 | 0.53       | <b>0.99</b>              | <b>0.99</b>              | 0.79        | 0.52                              | 0.74                     |
| Sitosterol                           | 0.88       | 0.79        | -           | 0.89                                 | 0.81                     | 0.85                      | 0.99        | 0.86                        | 0.93                                 | 0.71       | 0.81                     | 0.81                     | 0.98        | 0.72                              | 0.95                     |
| $\Delta^5$ -Avenasterol <sup>a</sup> | 0.84       | 0.65        | 0.89        | -                                    | 0.94                     | 0.97                      | 0.89        | 0.97                        | 0.98                                 | 0.83       | 0.68                     | 0.69                     | 0.88        | 0.89                              | 0.96                     |
| Spinasterol <sup>a</sup>             | 0.84       | 0.63        | 0.81        | 0.94                                 | -                        | 0.98                      | 0.82        | 0.97                        | 0.93                                 | 0.80       | 0.67                     | 0.68                     | 0.80        | 0.84                              | 0.90                     |
| Stigmasterol <sup>a</sup>            | 0.85       | 0.63        | 0.85        | 0.97                                 | 0.98                     | -                         | 0.86        | <b>0.99</b>                 | 0.97                                 | 0.85       | 0.67                     | 0.69                     | 0.84        | 0.89                              | 0.95                     |
| Campesterol                          | 0.87       | 0.79        | <b>0.99</b> | 0.89                                 | 0.82                     | 0.86                      | -           | 0.86                        | 0.86                                 | 0.72       | 0.81                     | 0.81                     | 0.98        | 0.73                              | 0.95                     |
| Brassicasterol <sup>b</sup>          | 0.86       | 0.64        | 0.86        | 0.97                                 | 0.97                     | <b>0.99</b>               | 0.86        | -                           | 0.97                                 | 0.86       | 0.68                     | 0.70                     | 0.85        | 0.90                              | 0.96                     |
| 24-Methylenecholesterol <sup>b</sup> | 0.90       | 0.74        | 0.93        | 0.98                                 | 0.93                     | 0.97                      | 0.86        | 0.97                        | -                                    | 0.84       | 0.77                     | 0.78                     | 0.92        | 0.89                              | <b>0.99</b>              |
| Ergosterol                           | 0.70       | 0.53        | 0.71        | 0.83                                 | 0.80                     | 0.85                      | 0.72        | 0.86                        | 0.84                                 | -          | 0.57                     | 0.60                     | 0.71        | 0.91                              | 0.84                     |
| Coprostanol <sup>c</sup>             | 0.84       | <b>0.99</b> | 0.81        | 0.68                                 | 0.67                     | 0.67                      | 0.81        | 0.68                        | 0.77                                 | 0.57       | -                        | <b>1.00</b>              | 0.81        | 0.55                              | 0.76                     |
| Cholestanol <sup>c</sup>             | 0.86       | <b>0.99</b> | 0.81        | 0.69                                 | 0.68                     | 0.69                      | 0.81        | 0.70                        | 0.78                                 | 0.60       | <b>1.00</b>              | -                        | 0.81        | 0.58                              | 0.78                     |
| Cholesterol                          | 0.86       | 0.79        | 0.98        | 0.88                                 | 0.80                     | 0.84                      | 0.98        | 0.85                        | 0.92                                 | 0.71       | 0.81                     | 0.81                     | -           | 0.72                              | 0.93                     |
| 7-Dehydrocholesterol <sup>d</sup>    | 0.72       | 0.52        | 0.72        | 0.89                                 | 0.84                     | 0.89                      | 0.73        | 0.90                        | 0.89                                 | 0.91       | 0.55                     | 0.58                     | 0.72        | -                                 | 0.88                     |
| Desmosterol <sup>d</sup>             | 0.90       | 0.74        | 0.95        | 0.96                                 | 0.90                     | 0.95                      | 0.95        | 0.96                        | 0.99                                 | 0.84       | 0.76                     | 0.78                     | 0.93        | 0.88                              | -                        |

<sup>a</sup>sterols with  $m/z$  395

<sup>b</sup>sterols with  $m/z$  383

<sup>c</sup>sterols with  $m/z$  371

<sup>d</sup>sterols with  $m/z$  367

## 2) ESI-MS/MS spectra of free sterols (FS)

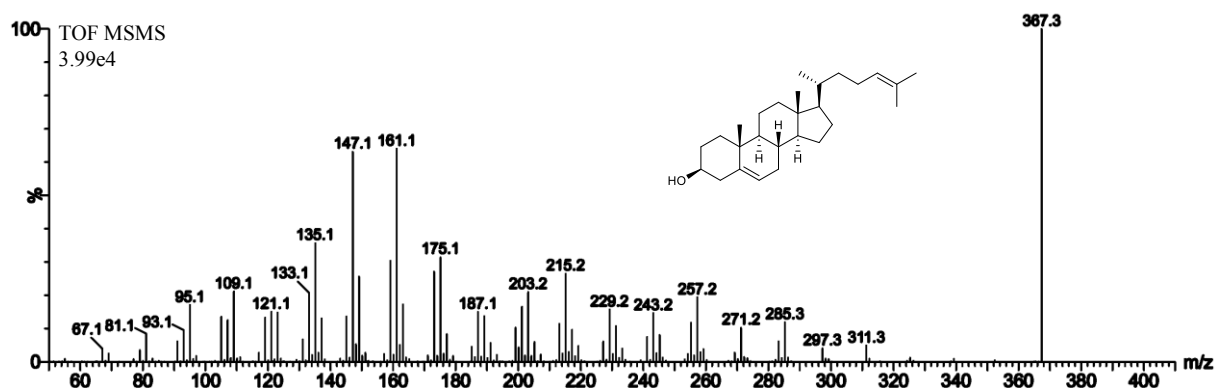

Fig. S1 ESI-MS/MS spectra of desmosterol at 25 V as  $[\text{FS-H}_2\text{O}+\text{H}]^+$ .

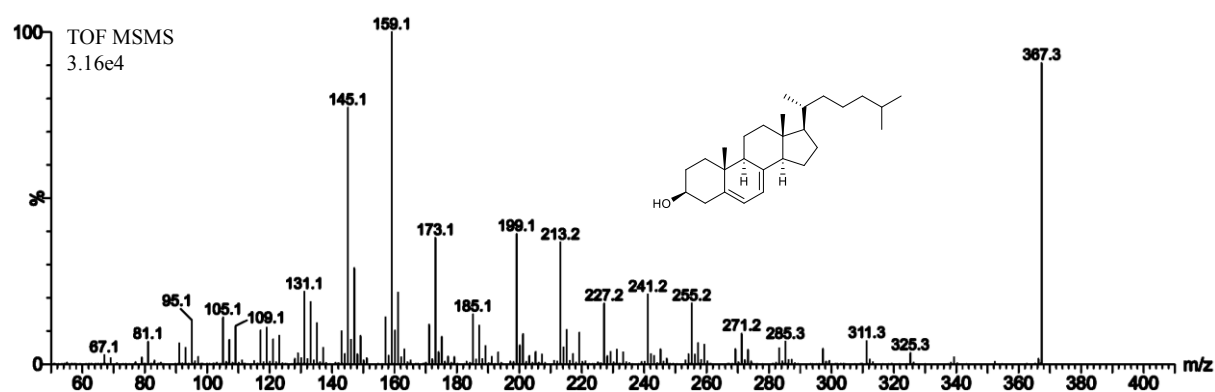

Fig. S2 ESI-MS/MS spectra of 7-dehydrosterol at 25 V as  $[\text{FS-H}_2\text{O}+\text{H}]^+$ .

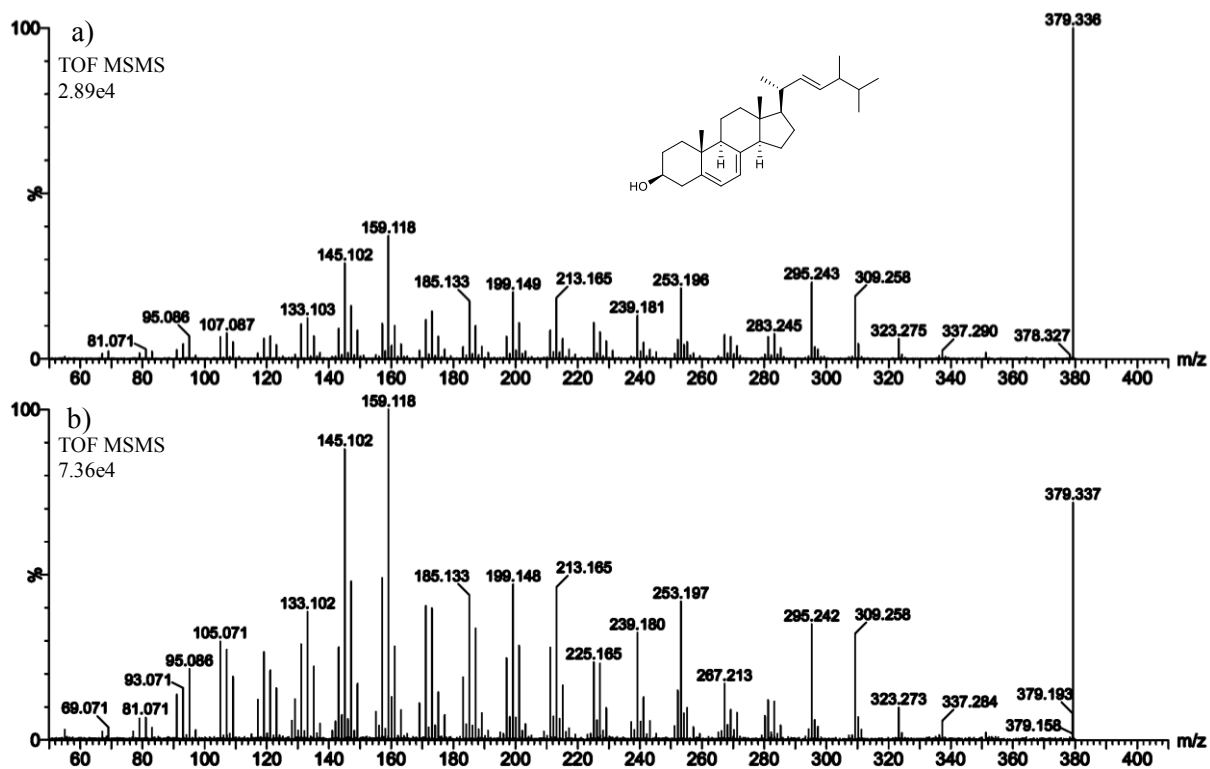

Fig. S3 ESI-MS/MS spectra of ergosterol at a) 25 V and b) 30 V as  $[\text{FS-H}_2\text{O}+\text{H}]^+$ .

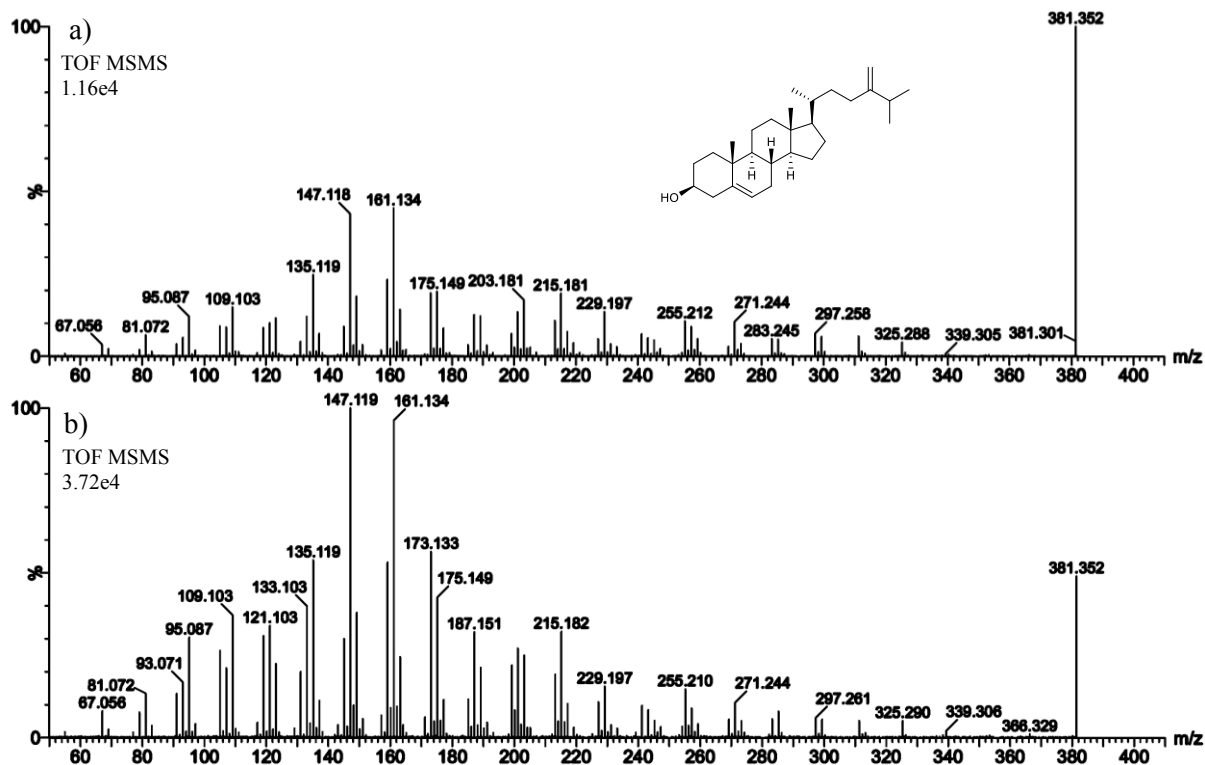

Fig. S4 ESI-MS/MS spectra of 24-methylenecholesterol at a) 25 V and b) 30 V as  $[FS-H_2O+H]^+$ .

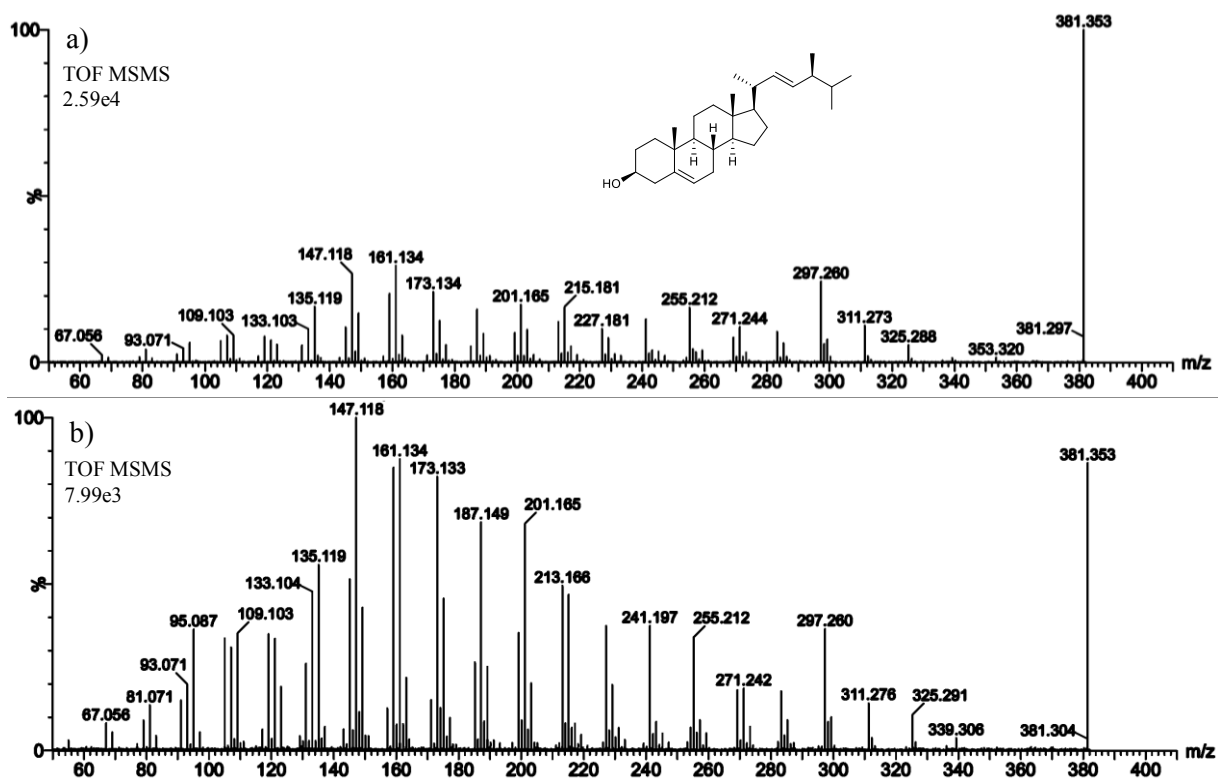

Fig. S5 ESI-MS/MS spectra of brassicasterol at a) 25 V and b) 30 V as  $[FS-H_2O+H]^+$ .

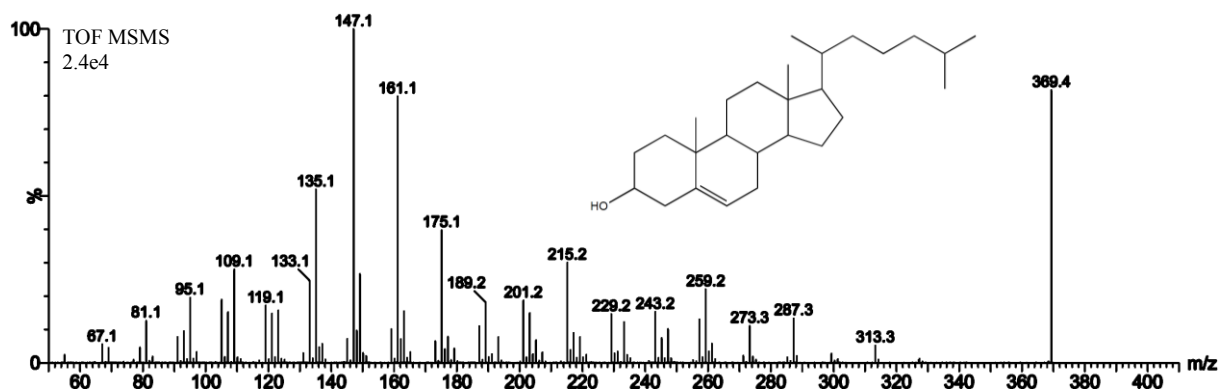

Fig. S6 ESI-MS/MS spectra of cholesterol at 25 V as  $[\text{FS-H}_2\text{O}+\text{H}]^+$ .

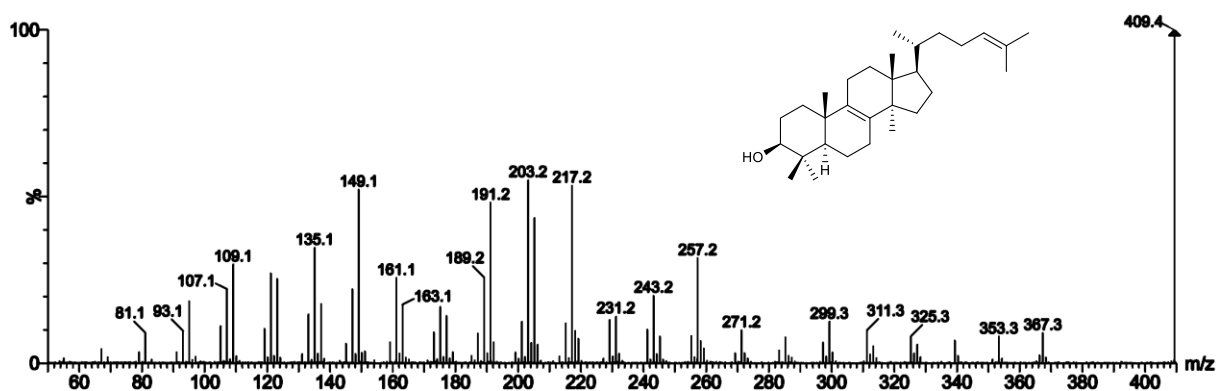

Fig. S7 ESI-MS/MS spectra of lanosterol at 25 V as  $[\text{FS-H}_2\text{O}+\text{H}]^+$ .

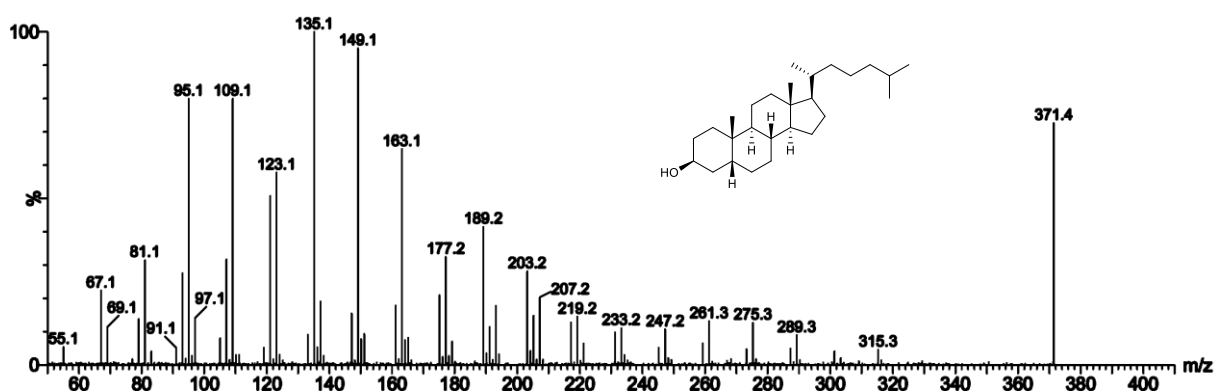

Fig. S8 ESI-MS/MS spectra of coprostanol at 25 V as  $[\text{FS-H}_2\text{O}+\text{H}]^+$ .

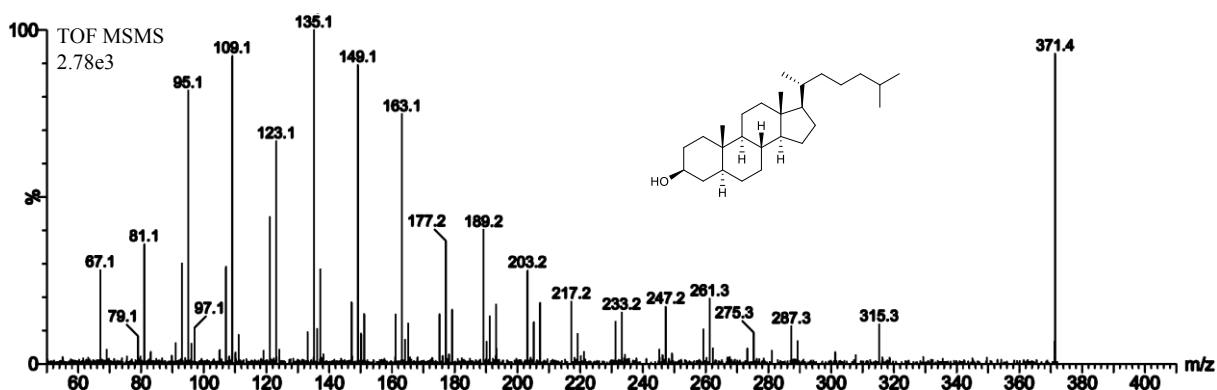

Fig. S9 ESI-MS/MS spectra of cholesterol at 25 V as  $[\text{FS-H}_2\text{O}+\text{H}]^+$ .

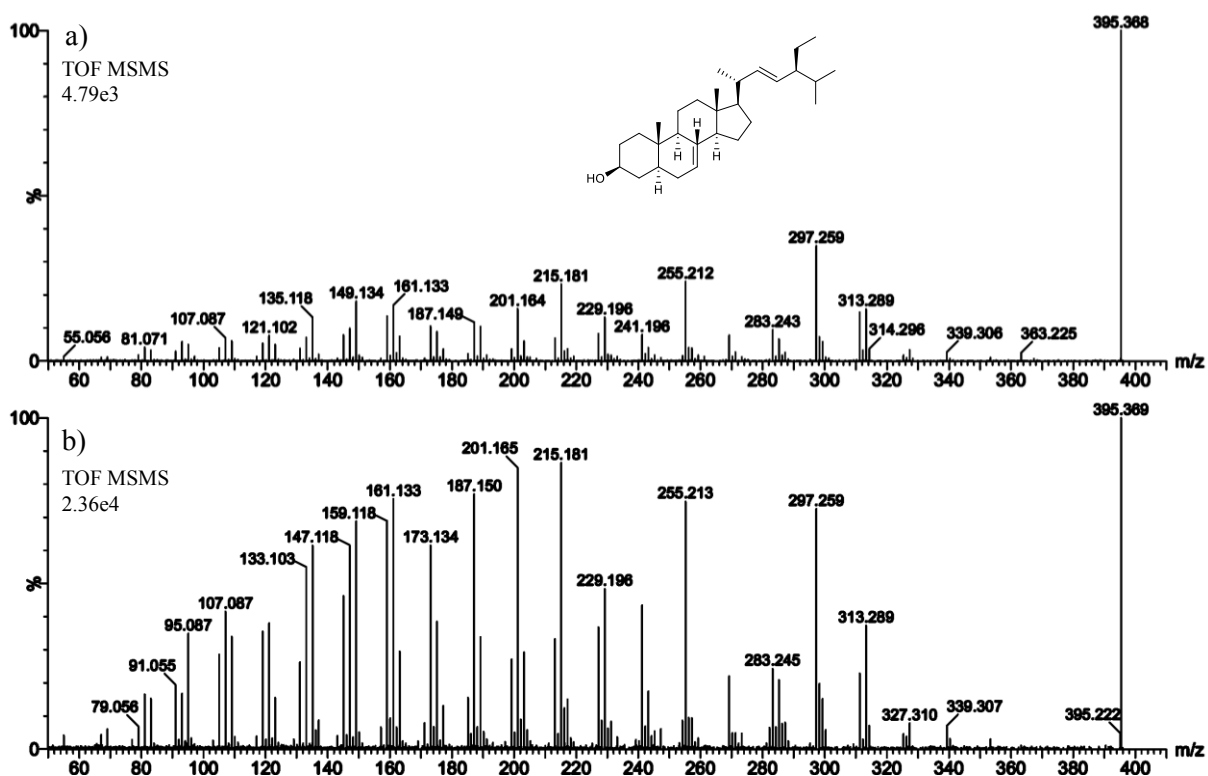

Fig. S10 ESI-MS/MS spectra of spinasterol at a) 25 V and b) 30 V as  $[\text{FS-H}_2\text{O}+\text{H}]^+$ .

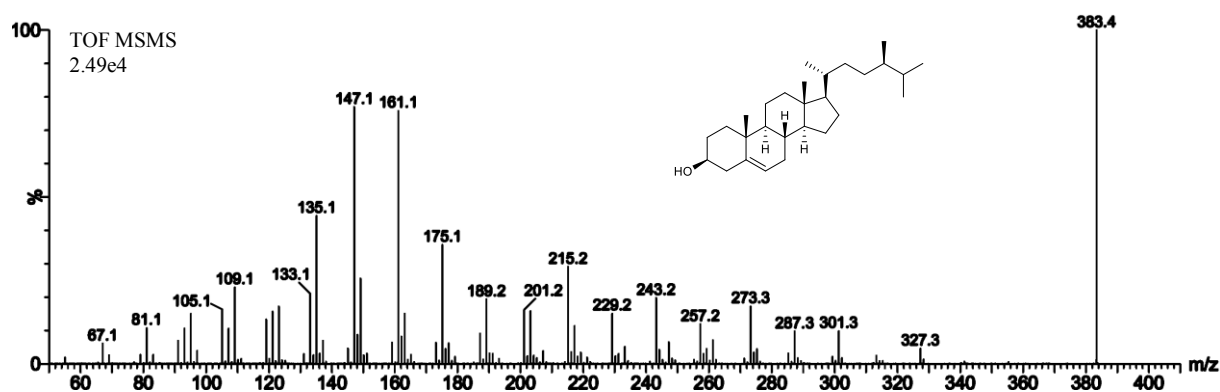

Fig. S11 ESI-MS/MS spectra of campesterol at 25 V as  $[\text{FS-H}_2\text{O}+\text{H}]^+$ .

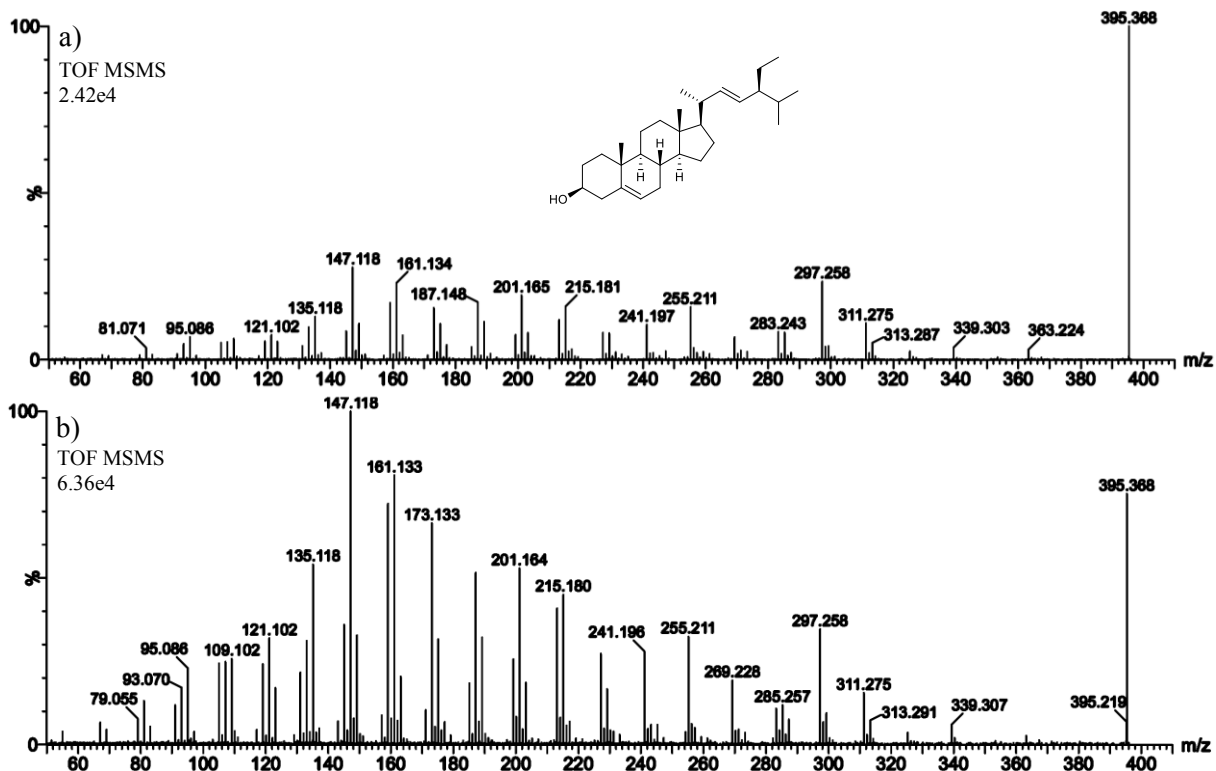

Fig. S12 ESI-MS/MS spectra of stigmasterol at a) 25 V and b) 30 V as  $[\text{FS-H}_2\text{O}+\text{H}]^+$ .

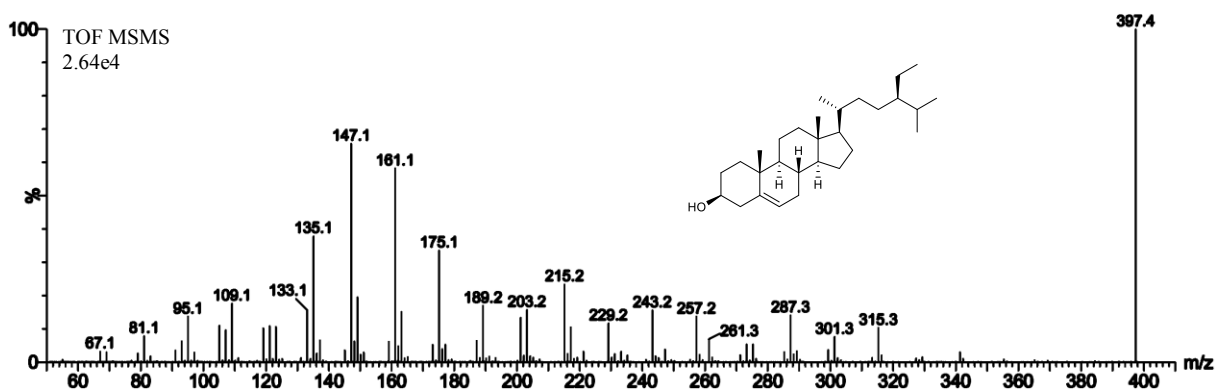

Fig. S13 ESI-MS/MS spectra of sitosterol at 25 V as  $[\text{FS-H}_2\text{O}+\text{H}]^+$ .

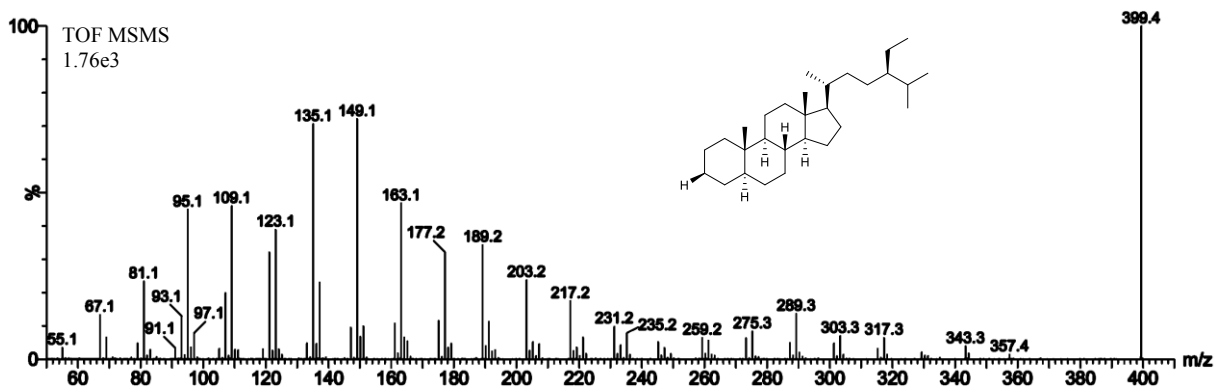

Fig. S14 ESI-MS/MS spectra of sitostanol at 25 V as  $[\text{FS-H}_2\text{O}+\text{H}]^+$ .



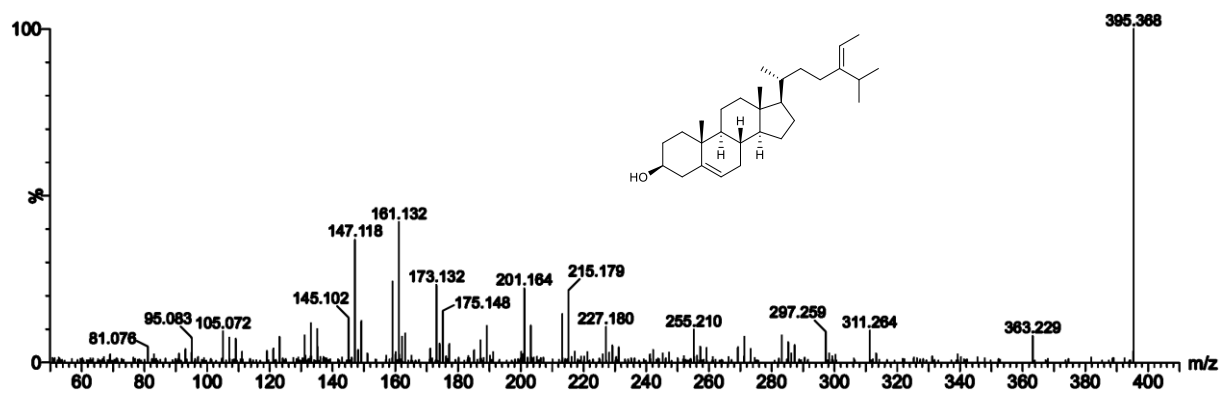

Fig. S15 ESI-MS/MS spectra of  $\Delta^5$ -avenasterol from oat bran at 25 V as  $[\text{FS}-\text{H}_2\text{O}+\text{H}]^+$ .

### 3) Fragmentation pathways

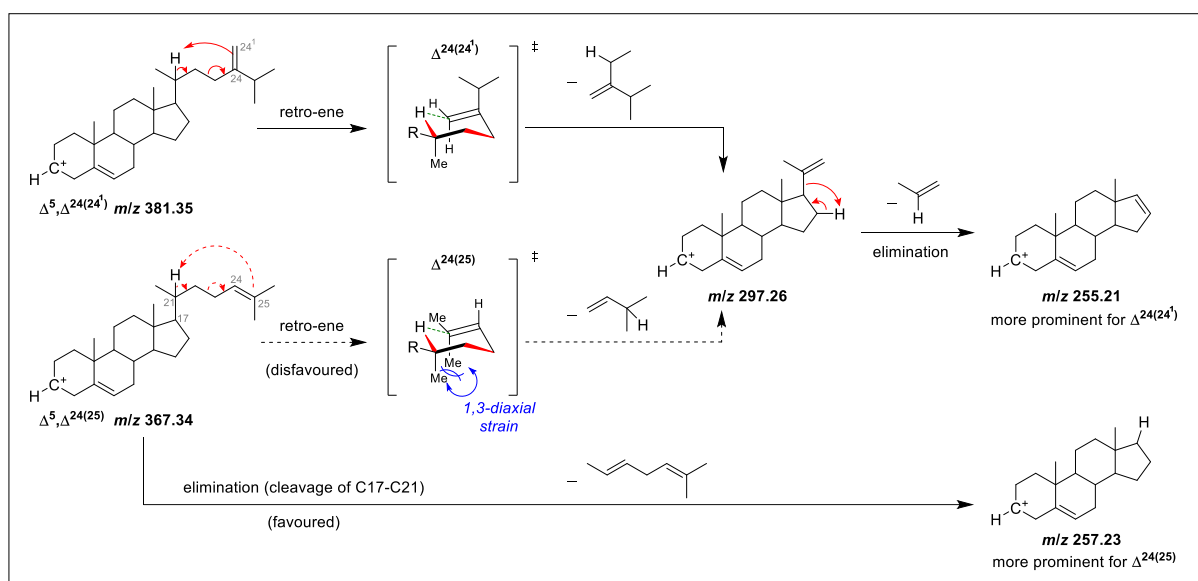

**Fig. S16:** The different preferred side chain fragmentation pathways depending on double bond position at C24(24<sup>1</sup>) or C24(25) are shown on the examples of 24-methylenecholesterol ( $\Delta^5, \Delta^{24(24^1)}$ ; top left) and  $\Delta^5$ -desmethylsterols ( $\Delta^5, \Delta^{24(25)}$ ; bottom left), respectively. The side chain fragmentation is induced by a retro-ene reaction, whereas the higher substituted C24(25) double bond leads to higher 1,3-diaxial strain of two methyl groups (Me $\leftrightarrow$ Me) in the chair conformation-like transition state ( $\ddagger$ ), making this path less favorable compared to the sterol with the less substituted C24(24<sup>1</sup>) double bond (Me $\leftrightarrow$ H). The resulting partial side chain loss species  $m/z$  297 is properly set up for an elimination reaction to the  $m/z$  255 species, as observed for  $\Delta^5, \Delta^{24(24^1)}$ -sterols. For  $\Delta^5, \Delta^{24(25)}$ -sterols, however, the side chain loss preferentially follows the pathway analogous to sterols with saturated side chain (see Fig. 4G), leading to  $m/z$  257 (bottom pathway). The same rationalization holds true for  $\Delta^{24(24^1)}$ - and  $\Delta^{24(25)}$ -sterols and their conjugates with additional C24<sup>1</sup>-methyl or C24-methyl/ethyl groups.

#### 4) GC-MS analysis of SG from potato peel after enzymatic hydrolysis

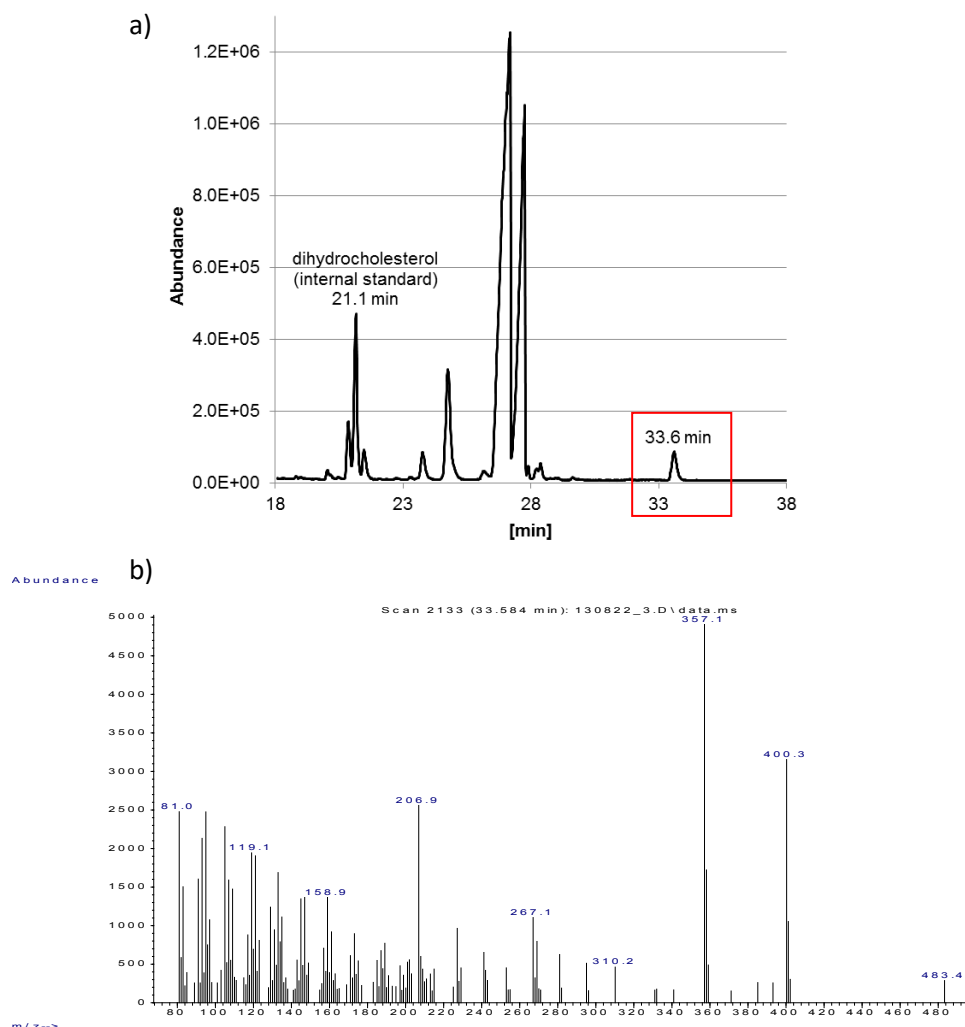

**Fig. S17** a) GC chromatogram of free sterols (FS) as TMS derivatives obtained after enzymatic hydrolysis of steryl glucosides (SG) extracted from potato peel (based on procedure as in Münger and Nyström, 2014<sup>a</sup>), sterol eluting at 33.6 min was identified as citrostadienol based on b) GC-MS spectrum of peak with retention time of 33.6 min; identified by comparison to published spectral data.<sup>b</sup>

<sup>a</sup>Münger, L.H., and Nyström, L. (2014). Enzymatic Hydrolysis of Steryl Glycosides for their Analysis in Foods. *Food Chem* 163, 202-211

<sup>b</sup>Kamal-Eldin, A., Appleqvist, L.A., Yousif, G., and Iskander, G.M. (1992). Seed Lipids of *Sesamum-Indicum* and Related Wild-Species in Sudan - the Sterols .3. *J Sci Food Agric* 59, 327-334
